# Supplementary material for: Polarization upgrade of specMACS: calibration and characterization of the 2D RGB polarization resolving cameras
Source: Copernicus journal article supplement (doi:10.5194/egusphere-2023-2209), 2023-11-01
Supplement: Supplementary file [file egusphere-2023-2209-AC2-supplement.pdf]

## Reply to referee comment #2

We thank Brent McBride for reviewing the manuscript and the valuable comments and suggestions which we address below. The responses to the referee comments are given in blue italic letters.

This paper discusses the calibration pipeline for the polarization resolving cameras of the spectrometer of the Munich Aerosol Scanner (specMACS). The authors discuss the instrument itself, then delve into geometric calibration of the image frame, dark characterization, non-linearity, spectral response, polarization calibration of an enclosing window and optical assembly, flatfielding, and absolute radiometric response. The authors close with a discussion of overall uncertainty and a measurement-model intercomparison over sunglint measured during a recent field campaign. This paper comes after Pörtge et al. (2023), which demonstrated the polarimetric cloud retrieval capabilities of the same specMACS cameras over marine and popcorn cumulus cloud fields. Polarimetric remote sensing is a hot topic in the climate community right now. Papers that demonstrate polarimeter instrument calibration (as well as their science) will continue to be relevant, interesting, and useful to AMT readers. I recommend publication with minor/optional revisions.

In-line comments:

Line 85: I understand that the Equation 1 is the form given in Hansen and Travis (1974), though the Sony sensor allows for a more comprehensive calculation using all four angles (shown in Lane et al. 2022):

$$I = 1/2(I_0 + I_{90} + I_{45} + I_{135})$$

This form is used later in the paper (as a normalization during polarization calibration, line 313), but it isn't clear to me if the actual intensity measurement (Stokes I) is calculated this way throughout the entire paper. Either way, please harmonize the definition of I across the paper. Also, the typical convention of V in Eq. (1) is flipped from what is shown (right – left).

*Thank you for your comment. We do indeed compute the I-component of the Stokes vector from our measurements with  $I = (I_0 + I_{45} + I_{90} + I_{135})/2$  using all four measured intensities. So, it was misleading to give the general definition of the Stokes vector in Eq. (1). We changed the equation to  $I = (I_0 + I_{45} + I_{90} + I_{135})/2$  to be consistent throughout the paper. In addition, we corrected the equation for the V component. Thank you very much for noting that.*

Section 3. I recommend to add a figure to this section. A visual of the chessboard calibration from the perspective of the specMACS sensor would help a lot with the interpretation here.

*We added a figure showing an example image of a chessboard as recommended.*

Line 193: Figure 3 shows that polL and polR have systematic differences in the forward and aft sides of the dark frame. Even at a ~2.5 counts spread, this structure is important to capture, and could be relatively easy to apply in post-processing on image data. At 30000DN, I agree it will not make much of a difference to use a single value or adopt a spatial dark map for correction. However, I imagine part of the interest in specMACS data goes beyond clouds – possibly to science retrievals

of aerosol, land, ocean, and free atmosphere properties. Many of these targets will not have 30000DN signals. For example, open ocean is extremely dark in RGB and can go to <5% in DOLP off-glint, like in Figure 12b. At these low light levels, a few counts could be important. Also, the later sections discuss the many ways that the calibration could be improved – using the spatial field of the dark (and scaling the dark counts relative to any measurement temperature) could be a step in this direction. I would consider including this in the calibration pipeline instead of a single value for the dark.

*Thank you very much for this comment. For our applications of the data to the remote sensing of cloud macro- and microphysical properties, using a single value for the dark signal is accurate enough, which is why we did not use the spatial field of the dark signal. The spread of about 2-3 counts is very small and the temperature dependency of the dark signal of about 0.16 during a typical flight negligible for our applications. But we agree that for other applications this might become relevant. We added a sentence noting that the calibration of the instrument could be improved by using the spatial field instead of single value and will keep that in mind for potential future applications to darker scenes:*

*“Moreover, the spatial field of the dark signal could be used instead of a single value for the dark signal correction to further reduce the calibration uncertainties for retrievals of e.g. aerosol or land properties with very small signal levels.”*

Figure 6. It is challenging to differentiate the curves in each figure due to the overlap and large scale. This could be stronger as a residual plot (i.e.  $S_{\tilde{o}} - S_o$ ), as a function exposure time for all pixels shown. Also, please make the points larger.

*Thank you very much for noting that. We changed the marker and increased the size of the points as suggested to make it easier to differentiate. We are aware that the overlap of the curves in the plot is not ideal. The reason for choosing this visualization is that we wanted to show the linear scaling of the measured signal with exposure time which is not visible in a residual plot. To further quantify the deviation of the signal from the linear relationship we added the percentages in the legend of the plot.*

Line 215: Relative to the detector spec, are these non-linearities reasonable?

*The camera specifications do not include information about non-linearities. However, the non-linearities we found are reasonable compared to other cameras (e.g. Forster et al. 2020).*

Figure 7. Is there is any new information in (a) and (c) that isn't already in (b) and (d)? If not, I recommend to only show (b) and (d).

*According to Poisson statistics the variance scales linearly with the signal. This linear behavior can nicely be seen in panels (a) and (c) which is why we added those two panels. We added this to the text to make it clearer:*

*“The noise characteristics of both cameras are well captured by the Poisson model. Panels (a) and (c) show the expected linear relationship between the variance and the signal while the noise scales with the square root of the signal in panels (b) and (d).”*

Figure 8. Though the smaller peaks in blue @ 650nm and in red @ 550nm are typical of some Bayer filter designs, how is this addressed in the radiometric calibration? This could be important for cross-talk considerations, and may have some influence on the error analysis in Table 3.

*The radiometric calibration was performed at the large integrating sphere whose output spectrum was measured by the CHB. We integrated this spectrum with the previously determined spectral response functions of the three color channels to obtain the output radiance of the LIS for the respective color channels for the absolute radiometric calibration. In this sense the smaller peaks were accounted for.*

Line 278 + Line 294: This may not hold for the entire specMACS FOV, though. The Lane et al. (2022) study prioritized pixels near the image center and predicted higher errors in focus and polarization measurement at large AOI. Since a single-camera specMACS FOV is decently large (~45 deg nadir-to-aft), and the Cinegon lens does not seem to be telecentric (from the spec), there will likely be AOI-related differences in the transfer matrix at wider angles. I am glad this is recognized by the authors in the discussion towards the end of the paper, but I would reword these statements to differentiate specMACS from the Lane et al. (2022) study a bit more here.

*Thank you for this comment. We changed the lines you mentioned and added more details to make the differences between the specMACS setup and Lane et al. (2022) clearer and avoid oversimplifications. Lines 279 and 294 read now:*

*“Lane et al. (2022) calibrated the monochromatic version of the polarization resolving cameras from the same manufacturer. They focused on the central pixels of the sensor and found that the transfer matrices are consistent across this sensor region and a single matrix can be applied to all pixels. In addition, the deviation between the measured matrices and the ideal matrix was small for the central pixel region with small incident angles which they considered.”*

*and*

*“According to Lane et al. (2022), the choice of the camera lens has only little influence on the transfer matrices for the central pixel region of the camera where the incident angles of the rays are small. Thus, we assume that our theoretical model of the transfer matrices is a good approximation. However, lenses can introduce polarization aberrations especially for larger incident angles towards the corner regions (Chipman et al., 2018). This effect is not included in the theoretical polarization calibration model. Because of that, we validated the theoretical model with a laboratory polarization calibration.”*

Line 320: I strongly recommend to add a figure that visually explains these three reference frames. It is difficult to reconcile them from the text alone and the following paragraphs require the reader to fully understand each one.

*We added more details about the different reference systems in the text and also tried to give more detailed descriptions of the different steps of the laboratory polarization calibration in order to make our methods more comprehensible. In addition, we added a reference which includes sketches visualizing the different reference systems. The section explaining the reference systems reads now: “The Stokes vector as well as the transfer matrix are always defined relative to a reference plane. In connection with the polarization calibration, we distinguish three different reference systems. The laboratory reference system is defined by the plane containing the 0°-axis of the linear polarizer*

*between the large integrating sphere and the instrument and the normal of this polarizer. Moreover, the reference plane for the camera reference system for each camera is given by the x-z-plane of the camera coordinate system with the x-axis parallel to the 0°-direction of the polarizers on the sensor and the z-axis normal to the focal plane array of the camera. Finally, the Stokes vectors can be rotated from the camera reference system into the scattering plane. The scattering plane is the plane containing the vector of the incoming solar radiation and the viewing direction of each pixel. Sketches visualizing the different reference systems can for example be found in Eshelman et al. (2019). The transformation from the camera coordinate system to the scattering plane is known from the geometric calibration and varies between different observation geometries with different vectors of the incoming solar radiation. Thus, with the laboratory polarization calibration, we aim for computing the transfer matrices in the camera reference system.”*

Line 359: The reconstruction error on I of 10-13% is incredibly small versus the error on Q. Even with normalized intensities, I would still expect to see a reconstruction error in the ballpark of what is reported for Q. This suggests to me that the derivation of the transfer matrix is weighting the I inputs more strongly than Q or U. Can you give more details on how that value was derived?

*The transfer matrices were derived by solving equation 9 in a least-squares sense with  $A = (I_n - d_n)S_n^{-1}$  where  $S_n^{-1}$  is the pseudo-inverse of the incoming Stokes vectors  $S_n$ . The measured Stokes vectors were then reconstructed from the measured intensities via  $S_{n,r} = A^{-1} (I_n - d_n)$ . Finally, we computed the reconstruction error which we define as the relative difference between the reconstructed Stokes vectors  $S_{n,r}$  and the incoming Stokes vectors  $S_n$ . The given values of the reconstruction error are mean values across all measured pixels. We added an additional reference and more detailed description of the method throughout the entire section and included the equations above to the paragraph.*

Line 365: Why is it useful to know that the specMACS pol cameras would be between 3 and 5% biased, if they were used uncalibrated while imaging a target with DOLP = 1? Most scientists will never use uncalibrated specMACS data – maybe this is a marker of how close the instrument is to an ideal calibration already? Either way, I suggest changing this to how much error we could expect to see in a calibrated specMACS DOLP measurement (or defer this to Table 3 – see comment below).

*With the laboratory polarization calibration, we analyzed the polarization properties and determined transfer matrices for significant parts of the field of view but we could not cover the entire field of view of the cameras. Because of that, we developed the theoretical polarization model and validated it with the laboratory polarization calibration. In this context, the polarization calibration error introduced by Lane et al. (2022) is useful, since it indicates that the instrument is in fact close to an ideal calibration concerning polarization. Thus, the use of the ideal transfer matrix in the theoretical model covering the entire field of view can be justified and introduces only small errors. We added a sentence to clarify that:*

*“These small errors indicate that the cameras are close to ideal cameras concerning polarization and the error introduced by using the ideal transfer matrix instead of the transfer matrices obtained from the laboratory polarization calibration is small.”*

*For the DOLP, see the answer to the comment below.*

Line 390: Systematic and spatial differences between model and measurement in Figures 10 and 11 on the order of 2-6% are quite large for a flatfield residual. This may impact science retrievals done

in specific pixel regions – was there any reason not to trust the spatial distribution of the LIS field outright? Integrating spheres should be excellent spatial sources for flatfield.

The other way to approach this could be to step the specMACS field of view across the LIS aperture while taking images. This would place the LIS aperture in different locations of the FOV and fully cover the FPA in a “composite” flatfield over all images taken. Was a test like this considered? I am not requesting extra work, but for this section, I would add more details about why a model was preferred despite significant spatial residuals in Figures 10 and 11.

*Due to the large field of view, it was not possible to perform flatfield measurements covering the entire field of view. Even the composite method you propose was not possible because we could not tilt the instrument to cover e.g. also the corner regions due to its large size and weight. Because of that we chose the model to obtain a vignetting correction for the entire field of view despite the non-negligible residuals. At least part of the residuals can be attributed to inhomogeneities of the large integrating sphere. In the center of the sphere the inhomogeneities were characterized to be 0.25%. Further towards the sides the inhomogeneities are expected to be larger. On the other hand, the model does not account for pixel by pixel variations or photo response non-uniformity besides the vignetting effect which can be an explanation for some residuals.*

*We added more details about this to the text:*

*“The model was chosen for the vignetting correction despite the non-negligible residuals between the vignetting model and the flat-field measurements in order to obtain a vignetting correction for the entire field of view. Due to the large field of view of the instrument and its large size and weight, it was not possible to perform flat-field measurements covering the entire field of view of the cameras even with a composite method. The residuals include inhomogeneities of the LIS as well as deviations of the photo response non-uniformity of the cameras from the vignetting model.”*

Line 435: I recommend including a table that lists the sigma errors for each of the terms in Eq. (22), for each wavelength – or if some are functions, give the functional form. Much of this data is already given throughout the paper, but a summary table is preferable.

*We tried to create a comprehensive table, however, it became very large due to the two cameras, three color channels, different Stokes vector components, and finally all components of equation 22. Because of that, instead, we added references to the respective sections where we tried to give more details and descriptions of the components of the equation where they were missing. In addition, we included the relative radiometric uncertainty into the table, to have at least the relative and absolute radiometric uncertainty given.*

Table 3. Can you also provide the uncertainty for DOLP? This is a benchmark used to gauge the overall polarization accuracy of a multi-angle polarimeter. This may take further propagation of Eq. (22), but it is also important to show (especially relative to typical atmospheric signals).

*We computed the uncertainty of the DOLP with Gaussian error propagation as suggested and added a description and discussion about it to the section. Since the DOLP is independent of the absolute radiometric response a differentiation of relative and absolute radiometric uncertainty is not reasonable and we included the DOLP uncertainties directly in the text instead of the table.*

*“Another important quantity for polarization applications is the degree of linear polarization which can be computed from the Stokes vector with  $DOLP = \sqrt{Q^2 + U^2}/I$ . The degree of linear polarization is invariant under rotations and independent of the absolute radiometric response. Its*

*relative uncertainty was computed via Gaussian error propagation from the uncertainties above. For Stokes vectors rotated into the scattering plane, the U component of the Stokes vector is much smaller than Q. Thus, neglecting the U component, the relative uncertainty of the DOLP can be calculated with  $\sigma_{DOLP}/DOLP = \sqrt{(\sigma_I/I)^2 + (\sigma_Q/Q)^2}$ . It amounts to 5.4%, 5.4%, and 6.9% for the red, green, and blue channel of polLL and 4.8%, 4.9%, and 6.2% for polLR for the same typical signal level and DOLP as in Table 3. “*
